# Supplementary material for: Sequencing depth and genotype quality: accuracy and breeding operation considerations for genomic selection applications in autopolyploid crops
Source: PubMed Central journal article supplement (PMC7567692; doi:10.1007/s00122-020-03673-2), 2020-09-02
Supplement: 122_2020_3673_MOESM1_ESM.pdf [file 122_2020_3673_MOESM1_ESM.pdf]

# Sequencing depth and genotype quality: Accuracy and breeding operation considerations for genomic selection applications in autopolyploid crops

Dorcus C Gemenet<sup>1,4</sup>, Hannele Lindqvist-Kreuze<sup>2</sup>, Bert De Boeck<sup>2</sup>, Guilherme da Silva Pereira<sup>3,5</sup>, Marcelo Mollinari<sup>3</sup>, Zhao-Bang Zeng<sup>3</sup>, G Craig Yencho<sup>3</sup>, Hugo Campos<sup>2</sup>

<sup>1</sup>International Potato Center, ILRI Campus, P.O. Box 25171-00603, Nairobi, Kenya

<sup>2</sup>International Potato Center, Av. La Molina 1895, Lima, Peru

<sup>3</sup>North Carolina State University, Raleigh, NC 27695, USA

<sup>4</sup>Current address: CGIAR Excellence in Breeding Platform, CIMMYT, ICRAF Campus, Nairobi, Kenya

<sup>5</sup>Current address: University of Sao Paulo, Brazil

**Online Resource 1** Growing conditions for sweetpotato mapping population (BT) experiments in five environments of Peru indicating, geographic positions, elevation, mean atmospheric temperature ( $\mu$ Temp), mean photosynthetically active radiation ( $\mu$ PAR), rainfall, relative humidity, soil conditions, planting designs, planting and harvesting dates. **Published in Gemenet et al. 2020.**

|                         | Ica16C           | Ica16D | Ica17C             | Ica17D | SR16             |
|-------------------------|------------------|--------|--------------------|--------|------------------|
| Location                | Ica              |        |                    |        | San Ramon        |
| Latitude                | 14° 01' 44.7" S  |        |                    |        | 11°07'29"S       |
| Longitude               | 75° 44' 37.5" W  |        |                    |        | 75° 21' 25" W    |
| Altitude                | 420 masl         |        |                    |        | 820 masl         |
| Plot size               | 6 m <sup>2</sup> |        | 4.8 m <sup>2</sup> |        | 9 m <sup>2</sup> |
| $\mu$ Temp              | 22 °C            |        | 24 °C              |        | 27 °C            |
| $\mu$ PAR               | 359 uE           |        | 458 uE             |        |                  |
| Rainfall                | 0 mm             |        | 5 mm               |        | 122 mm           |
| Relative humidity       | 69%              |        | 66%                |        | 61%              |
| SoilTemp                | 25°C             | 23.6°C | 27 °C              | 26 °C  |                  |
| Soil type               | Sandy Loam       |        |                    |        | Sandy clay loam  |
| Electrical conductivity | 2.26 dS/m        |        | 0.40 dS/m          |        | 0.07 ds/m        |
| pH                      | 7.78             |        | 8.4                |        | 5.6              |

|                       | Ica16C     | Ica16D   | Ica17C     | Ica17D   | SR16       |
|-----------------------|------------|----------|------------|----------|------------|
| Bulk density          | 1.44 g/cc  |          |            |          |            |
| Field capacity        | 14.70%     |          |            |          |            |
| Wilting point         | 7.60%      |          |            |          |            |
| $\mu$ Water potential | -233 KPa   | -719 KPa | -73 KPa    | -459 KPa |            |
| Planting date         | 25/02/2016 |          | 15/11/2016 |          | 14/05/2016 |
| Harvesting date       | 29/06/2016 |          | 17/03/2017 |          | 15/09/2016 |
| Replications          | 2          |          |            |          | 3          |
