# Supplementary material for: Sequencing depth and genotype quality: accuracy and breeding operation considerations for genomic selection applications in autopolyploid crops
Source: PubMed Central journal article supplement (PMC7567692; doi:10.1007/s00122-020-03673-2), 2020-09-02
Supplement: 122_2020_3673_MOESM7_ESM.pdf [file 122_2020_3673_MOESM7_ESM.pdf]

# Sequencing depth and genotype quality: Accuracy and breeding operation considerations for genomic selection applications in autopolyploid crops

Dorcus C Gemenet<sup>1,4</sup>, Hannele Lindqvist-Kreuze<sup>2</sup>, Bert De Boeck<sup>2</sup>, Guilherme da Silva Pereira<sup>3,5</sup>, Marcelo Mollinari<sup>3</sup>, Zhao-Bang Zeng<sup>3</sup>, G Craig Yencho<sup>3</sup>, Hugo Campos<sup>2</sup>

<sup>1</sup>International Potato Center, ILRI Campus, P.O. Box 25171-00603, Nairobi, Kenya

<sup>2</sup>International Potato Center, Av. La Molina 1895, Lima, Peru

<sup>3</sup>North Carolina State University, Raleigh, NC 27695, USA

<sup>4</sup>Current address: CGIAR Excellence in Breeding Platform, CIMMYT, ICRAF Campus, Nairobi, Kenya

<sup>5</sup>Current address: University of Sao Paulo, Brazil

## Online Resource 7: QTL summary information in sweetpotato

**Table 1** Summary of quantitative trait loci (QTL) for dry matter (DM), starch,  $\beta$ -carotene (BC), flesh color in Peru (FC\_P) and flesh color in Uganda (FC\_U) in sweetpotato. **Published in Gemenet et al. (2020).**

| Trait  | QTL | <sup>a</sup> LG | <sup>b</sup> Pos (cM) | <sup>b</sup> SI (cM) | Score   | <i>p</i> -value | $\sigma^2_{QTL}$ | <sup>c</sup> $h^2_{QTL}$ |
|--------|-----|-----------------|-----------------------|----------------------|---------|-----------------|------------------|--------------------------|
| DM     | 1   | 1               | 11.41                 | 0.00-21.02           | 158.93  | 1.59e-04        | 0.6590           | 0.069                    |
|        | 2   | 3               | 37.44                 | 4.68-62.06           | 604.15  | <1.00e-16       | 3.5713           | 0.374                    |
|        | 3   | 3               | 217.13                | 193.17-222.06        | 133.93  | 6.00e-04        | 0.5904           | 0.062                    |
|        | 4   | 7               | 100.26                | 65.46-113.08         | 151.34  | 2.99e-04        | 0.5702           | 0.060                    |
|        | 5   | 12              | 150.05                | 146.02-155.04        | 264.05  | 1.57e-07        | 1.0657           | 0.112                    |
| Starch | 1   | 3               | 37.44                 | 0.00-84.32           | 849.10  | <1.00e-16       | 21.3694          | 0.512                    |
|        | 2   | 12              | 147.31                | 146.02-150.05        | 435.34  | <1.00e-16       | 7.0820           | 0.170                    |
| BC     | 1   | 3               | 36.14                 | 0.00-121             | 1067.07 | <1.00e-16       | 336.9740         | 0.502                    |
|        | 2   | 12              | 146.02                | 124.12-176.02        | 828.83  | <1.00e-16       | 194.5965         | 0.290                    |
| FC_P   | 1   | 3               | 36.14                 | 0.00-122.1           | 1262.29 | <1.00e-16       | 1.1444           | 0.536                    |
|        | 2   | 12              | 146.02                | 117.02-180.05        | 944.49  | <1.00e-16       | 0.6259           | 0.293                    |
| FC_U   | 1   | 3               | 36.14                 | 0.00-88.10           | 1064.73 | <1.00e-16       | 28.5757          | 0.488                    |
|        | 2   | 4               | 213.05                | 200.09-227.13        | 135.98  | 9.20e-04        | 1.8504           | 0.032                    |
|        | 3   | 12              | 146.02                | 121.41-176.02        | 794.68  | <1.00e-16       | 16.2076          | 0.277                    |

<sup>a</sup>Linkage group

<sup>b</sup>Position in centiMorgans

<sup>b</sup>Support interval in centiMorgans

<sup>c</sup>proportion of total variance explained by a QTL

**Table 2** Summary of quantitative trait loci (QTL) for yield related traits. Obtained from **Pereira et al. (2020)**.

| Trait <sup>a</sup> | QTL | LG <sup>b</sup> | Pos (cM) <sup>c</sup>  | Score  | p-value               | $\sigma_{QTL}^2$ | $h_{QTL}^2$ (%) <sup>d</sup> |
|--------------------|-----|-----------------|------------------------|--------|-----------------------|------------------|------------------------------|
| NOCR               | 1   | 1               | 137.60 (99.43-152.87)  | 222.89 | $9.35 \times 10^{-6}$ | 0.0622           | 13.70                        |
|                    | 2   | 3               | 20.18 (0.00-49.27)     | 172.52 | $1.37 \times 10^{-4}$ | 0.0996           | 21.93                        |
| TNR                | 2   | 1               | 140.43 (128.08-152.87) | 251.13 | $7.36 \times 10^{-7}$ | 0.1789           | 10.97                        |
|                    | 3   | 3               | 20.18 (13.11-43.69)    | 279.18 | $1.42 \times 10^{-7}$ | 0.3595           | 22.04                        |
|                    | 4   | 10              | 165.43 (102.26-187.27) | 192.09 | $2.69 \times 10^{-5}$ | 0.1467           | 8.99                         |
|                    | 4   | 15              | 78.04 (35.50-119.08)   | 207.07 | $1.34 \times 10^{-5}$ | 0.2131           | 13.06                        |
| CYTHA              | 1   | 15              | 5.34 (0.00-34.27)      | 242.24 | $5.62 \times 10^{-6}$ | 6.3128           | 19.93                        |
| RYTHA              | 1   | 15              | 5.34 (0.00-35.50)      | 226.56 | $1.32 \times 10^{-5}$ | 6.9177           | 18.97                        |
| FYTHA              | 1   | 10              | 29.09 (16.12-134.37)   | 203.16 | $4.40 \times 10^{-5}$ | 2.1077           | 14.78                        |

<sup>a</sup>Trait abbreviations: number of commercial (NOCR) and total (TNR) roots per plant, commercial (CYTHA) and total (RYTHA) root yield in  $t \cdot ha^{-1}$ , foliage yield (FYTHA) in  $t \cdot ha^{-1}$ .

<sup>b</sup>Linkage group

<sup>c</sup>Position in centiMorgans and ~95% support interval in brackets

<sup>d</sup>Proportion of total variance explained by a QTL.
