# Supplementary material for: Sequencing depth and genotype quality: accuracy and breeding operation considerations for genomic selection applications in autopolyploid crops
Source: PubMed Central journal article supplement (PMC7567692; doi:10.1007/s00122-020-03673-2), 2020-09-02

Number of markers vs PA

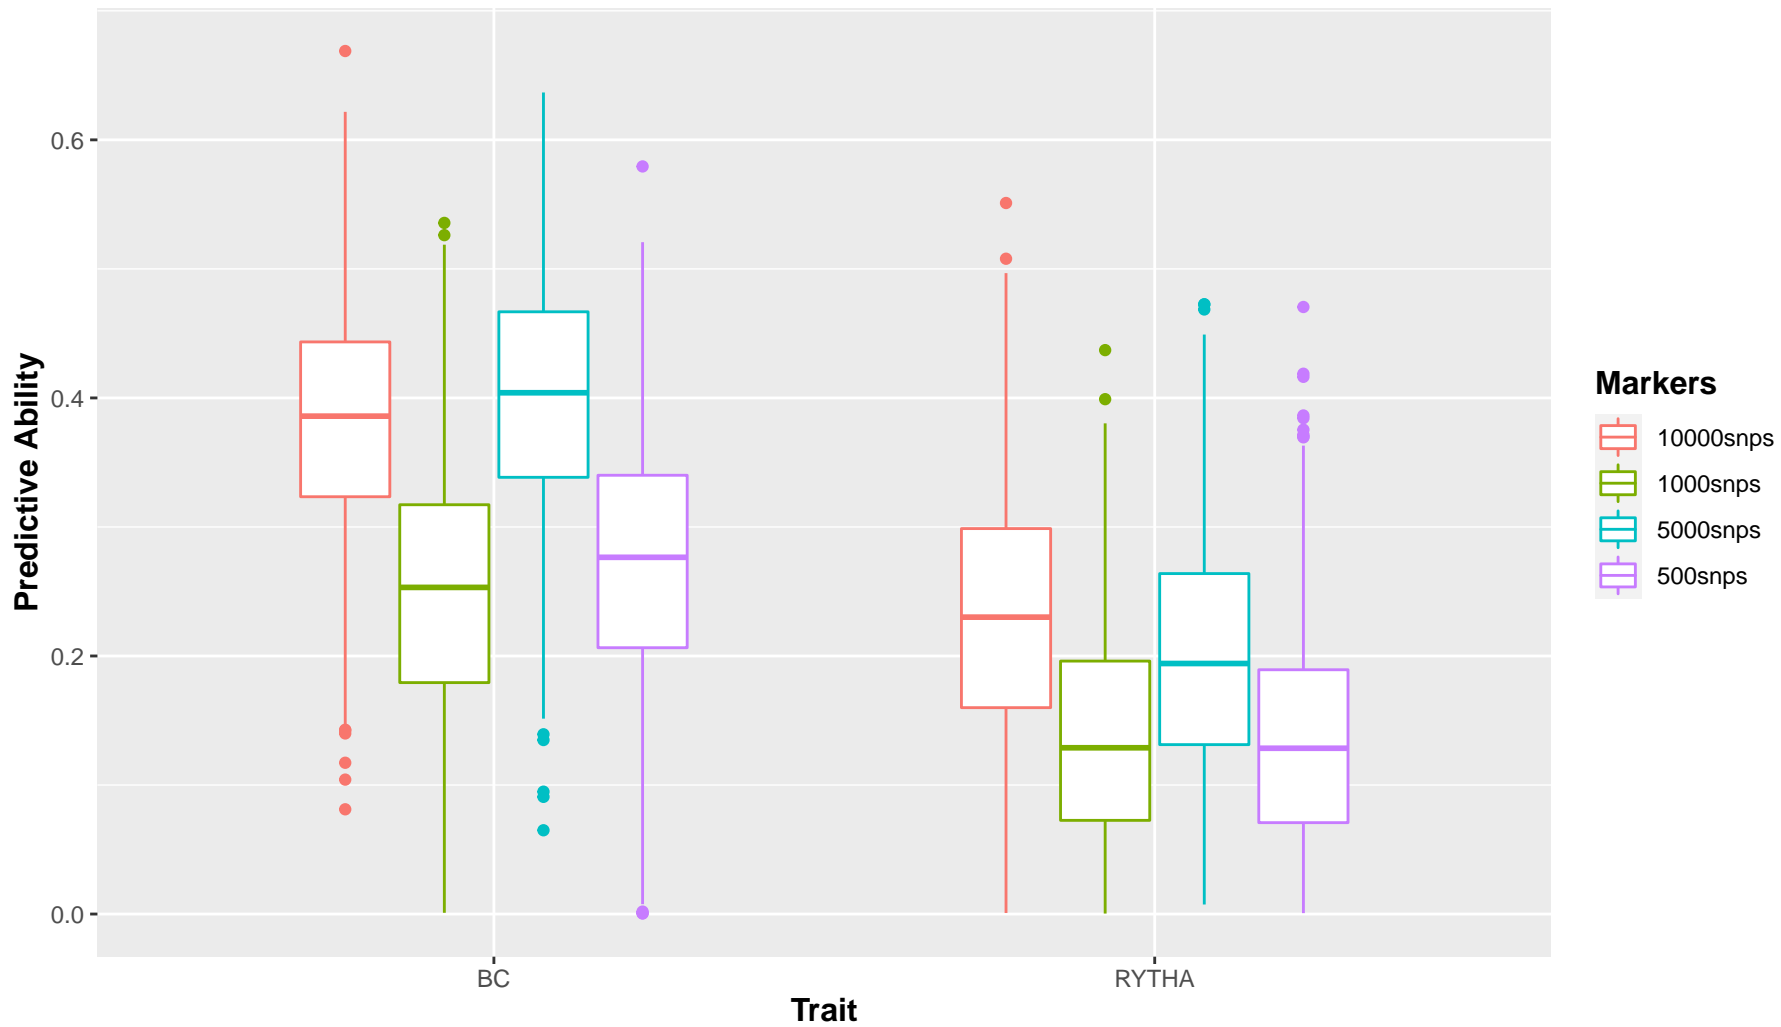

Supplement: 122_2020_3673_MOESM10_ESM.pdf [file 122_2020_3673_MOESM10_ESM.pdf]
